- JM, Merchant RN: Design and evaluation of a closed-loop anesthesia system with robust control and safety system. *Anesth Analg* 2018; 127:883–94
59. Barrington MJ, Viero LP, Kluger R, Clarke AL, Ivanusic JJ, Wong DM: Determining the learning curve for acquiring core sonographic skills for ultrasound-guided axillary brachial plexus block. *Reg Anesth Pain Med* 2016; 41:667–70
  60. Nguyen BV, Prat G, Vincent JL, Nowak E, Bizien N, Tonnelier JM, Renault A, Ould-Ahmed M, Boles JM, L'Her E: Determination of the learning curve for ultrasound-guided jugular central venous catheter placement. *Intensive Care Med* 2014; 40:66–73
  61. Crawford IA: Lunar resources: A review. *Prog Phys Geogr Earth Environ* 2015; 39:137–67
  62. McQuillen JB, McKay TL, Griffin DW, Brown DF, Zoldak JT: Final report for intravenous fluid generation (IVGEN) spaceflight experiment. 2011. Available at: <http://ntrs.nasa.gov/search.jsp?R=20110014585>. Accessed December 10, 2020.
  63. Wong JY: 3D printing applications for space missions. *Aerospace Med Hum Perform* 2016; 87:580–2
  64. Eliassen HS, Aandstad A, Bjerkvig C, Fosse T, Audun Hervig T, Pidcock HF, Strandenes G: Making whole blood available in austere medical environments: Donor performance and safety. *Transfusion* 2016; 56 Suppl 2:S166–72

## ANESTHESIOLOGY REFLECTIONS FROM THE WOOD LIBRARY-MUSEUM

### George Harley's Triple Threat: The A.C.E. of Anesthetic Mixtures

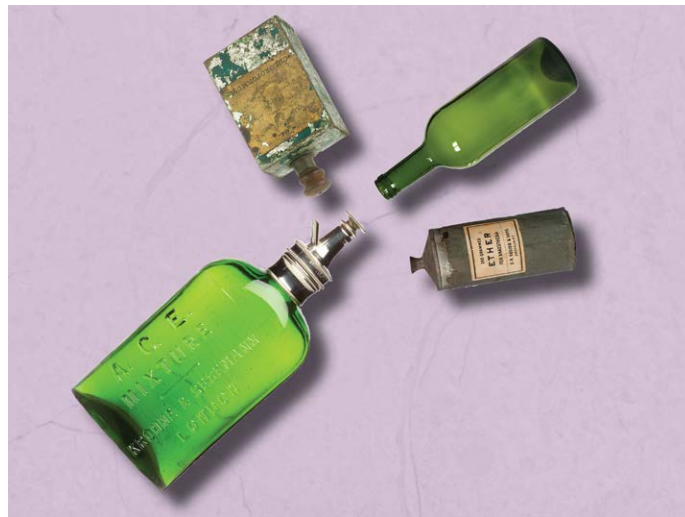

Many agents that rendered insensibility also promised transcendence, euphoria, even a touch of the sublime. Christened “*spiritus aethereus*” in 1730 by German mathematician F. G. Frobenius, ether, by its very name, evoked the heavens. One century later, neighbors of chloroform’s American co-discoverer, physician Samuel Guthrie, nicknamed his nectar-like substance “sweet whiskey.” After W. T. G. Morton’s 1846 demonstration, Americans exalted ether as the ace of anesthetics; however, the next year, Europeans deemed chloroform supreme. Although more cardiodepressive and arrhythmogenic than ether, chloroform afforded fragrant potency to achieve swift anesthetic depth. Nonetheless, rising deaths spurred the Royal Medico-Chirurgical (Surgical) Society of London to form an 1864 commission to examine chloroform’s physiological effects. A Scottish commissioner, physician George Harley, championed his A.C.E. mixture (*lower left*): a star-studded 1:2:3 ratio of alcohol (*upper middle*), chloroform (*upper left*), and ether (*upper right*). Combining the trio’s superlative properties—the (initial) stimulation of alcohol, the strength of chloroform, and the stability of ether—A.C.E. enjoyed first-rate popularity for decades to come. (Copyright © the American Society of Anesthesiologists’ Wood Library-Museum of Anesthesiology, Schaumburg, Illinois.)

Jane S. Moon, M.D., University of California, Los Angeles, California, and Melissa L. Coleman, M.D., Penn State College of Medicine, Hershey, Pennsylvania.
